# Supplementary material for: Phenotypic diversity is caused by non-linear genetic interactions between two SNAREopathy genes
Source: Research Square preprint supplement (doi:10.21203/rs.3.rs-6440830/v1), 2025-05-07
Supplement: Supplementary file 1 [file 8afcbce336e369ef093ed0bb.xlsx]

## Sheet: Suppl. Table 1
Suppl. Table 1: Statistical analysis per test
Aspect of behavior	Test performed	Paremeter	statistical analysis
		at P0	c2 = 5.969, p = 0.1131
		at P3w	ꭓ2 = 6.475, p = 0.0906
Survival rate		at >P6w	ꭓ2 = 8.864, p = 0.0311
Vision	Vision test	successful grabs	MWU, p = 0.345
Muscle strength	grip stregth meter	strength	t(22) = 1.836, p = 0.080
motor coordination	rotarod	maximal rpm	training: F(9,198) = 10.156, P<0.001; Genotype: F(1,22) = 0.390, p = 0.539; Interaction: F(9,198) = 1.115, p = 0.354
body weight			t(20) = 3.802, p = 0.001
acoustic startle response		startle threshold	t(18) = -0.342, p = 0.736
		average startle response per pulse intensity	genotype: F(1, 18) = 5.966, p = 0.025; intensity: F(1.718,30.916) = 27.907, p < 0.001; intensity x genotype: F(1.718,30.916) = 3.619, p = 0.045	posthoc: p = 0.038, p = 0.004, p = 0.004, p < 0.001 for pulse intensities of 100 dB, 105 dB, 110dB and 115 dB, respectively
	sensorimotor gating	PPI at 30 ms	t(18) = 2.060, p = 0.054
		PPI at 100 ms	t(18) = -0.840, p = 0.412
epileptiform events	SWDs	shapiro_wilk test for normal distribution	p = 0.034, p = 0.255, p = 0.352 and p < 0.001 *
	sharp spikes	shapiro_wilk test for normal distribution	p = 0.085, p = 0.040, p = 0.012, p = 0.107 *
	spike-slow wave	shapiro_wilk test for normal distribution	p = 0.001, p = 0.028, p = 0.042, p< 0.001 *
	ln(SWDs)	shapiro_wilk test for normal distribution	p = 0.182, p = 0.118, p = 0.654, p = 0.337 *
	ln(sharp spikes)	shapiro_wilk test for normal distribution	p = 0.953, p = 0.160, p = 0.555, p = 0.075 *
	ln(spike-slow wave)	shapiro_wilk test for normal distribution	p = 0.001, p = 0.270, p =0.801, p = 0.727 *
Associative learning and memory	Fear conditioning	Freezing in the training context (D2)	F(3,52) = 9.388, p < 0.001
		Freezing in the novel context (D3, T1)	F(3,52) = 4.567, p = 0.006;
		Freezing in the novel context during tone (D3,T2)	F(3,52) = 4.822, p = 0.005
Spatial learning and memory	Barnes maze	Escape latency during the acquisition phase	genotype:F(3,52) = 2.613, p = 0.061; training: F(3.207, 166.8) = 29.12, p < 0.001; genotype x training: F(12,208) = 0.9083, p = 0.540
		probability of hole visits during the first probe trial
		escape latency during the reversal training	genotype:F(3,52) = 2.874, p = 0.045; training: F(1.795, 93.34) = 30.10, p < 0.001; genotype x training: F(6, 104) = 1.321, p = 0.255	posthoc: p = 0.0011, p = 0,036 for HzHz vs. WThz and WtWt, respectively
Anxiety	Elevated plus maze	Time spent in open arms	t(22) = 2.561, p = 0.018
		Percentage visits open arms	t(22) = 3.216, p = 0.004
		Total distance moved	t(22) = -2.813, p = 0.040
	Open field	Time spent in center	t(22) = -0.285, p = 0.778
		Distance traveled in center	t(22) = -0.309, p = 0.761
		Total distance moved	t(22) = 0.303, p = 0.764
	Dark light box	Latency to visit BC	t(22) = -1.610, p = 0.122
		Visit to the BC	t(22) = -0.096, p = 0.924
		Time spent in BC	t(22) = -0.377, p = 0.710
				* (for wtwt, wthz, hzwt and hzhz mice)
Calcium imaging	Percentage of active cells		genotype: F(3,90) = 1.630, p = 0.188; condition: F(1,90) = 1.614, p = 0.207; interaction: F(3,90) = 1.555, p = 0.206
	Frequency of active cells		genotype: F(3,90) = 1.577, p = 0.205; condition: F(1,90) = 3.463, p = 0.066; interaction: F(3,90) = 1.102, p = 0.353
	Percentage of SSA cells		genotype: F(3,90) = 1.987, p = 0.122; condition: F(1,90) = 2.865, p = 0.094; interaction: F(3,90) = 3.419, p = 0.021
	Clustered frequency		genotype: F(3,90) = 4.374, p = 0.006; condition: F(1,90) = 5.354, p = 0.023; interaction: F(3,90) = 2.504, p = 0.064
		shapiro_wilk test WtHz	shapiro_wilk test HzHz	WtHz vs. WtWt	HzHz vs. WtWt
cFos	PFC	0.4448	0.0018(0.9499)	t(5) = 1.620, p = 0.1662	t(8)=1.743, p = 0.1195
	cortex	0.8178	0.0048( 0.7048)	t(4)=2.631, p = 0.0581	t(8)=2.730, p = 0.0259
	Thalamus	0.1166	0.0596	t(4)=2.031, p = 0.1121	t(9) =2.656, p = 0.0262
	DG	0.2753	0.0732	t(3)=1.854, p = 0.1608	t(8)=1.508, p = 0.17
	hc	0.2359	0.0104(0.6945)	t(3)=1.827, p = 0.1652	t(9)=2.169, p = 0.0582
			one-way ANOVA on normalized data
electrophysiology	L1( Kopenhagen), 2/2, glutamatergic	EPSC	F (3, 240) = 5.523, p = 0.0011	posthoc: wtwt vs hzwt, p = 0.0073, wtwt vs hzhz p = 0.0021
		RRP	F (3, 240) = 7.496, p < 0.0001	posthoc: wtwt vs. hzwt, p = 0.0001, wtwt vs. hzhz p = 0.0023
		mini_frequency	F (3, 235) = 3.942, p = 0.0090	posthoc: wtwt vs. hzwt, p = 0.063, wtwt vs. hzhz p = 0.0077
		mini_amplitude	F (3, 237) = 3.150, p = 0.0257	posthoc: wtwt vs. hzwt, p = 0.052, wtwt vs. wthz p = 0.052
	L1( Kopenhagen), 2/2, GABAergic	IPSC	F (3, 88) = 0.7358, p = 0.5334
		RRP	F (3, 86) = 0.7117, p = 0.5476
		mini_frequency	F (3, 75) = 1.014, p = 0.3915
		mini_ampl	F (3, 78) = 0.4097, p = 0.7465
	L2 (Amsterdam) 2/4, glutamatergic	EPSC	F (3, 94) = 2.525, p = 0.0623
		PPR 20ms	F (3, 84) = 0.7913, p = 0.5021
		PPR 50ms	F (3, 83) = 1.080, p = 0.3624
		PPR 100 ms	F (3, 77) = 0.9055, p = 0.4425
		cumulative charge at 40Hz	F (3, 76) = 2.124, P=0.1041
Immunocitochemistry	Glutamatergic cells	Total dendritic length	F (3, 154) = 1.214, p = 0.3065
		VGLUT-synaptic density	F (3, 154) = 2.834, p = 0.0402	post hoc: wtwt vs wthz, p < 0.05
		VGLUT-synaptic size	F (3, 154) = 3.828, p = 0.0111	post hoc: hzwt vs wthz, p < 0.05
		VGLUT-synaptic intensity	F (3, 154) = 1.867, p = 0.1375
	GABAergic cells	Total dendritic length	F (3, 58) = 0.9340, p = 0.4302
		VGAT-synaptic density	F (3, 58) = 1.910, p = 0.1379
		VGAT-synaptic size	F (3, 58) = 0.3186, p = 0.8119
		VGAT-synaptic intensity	F (3, 58) = 1.701, P=0.1769

## Sheet: Suppl. Table 2
Suppl.Table 2: Spontaneous behavior of double mutant mice in automated home-cage environment monitored during 2.5 days
Red color: values in mutant mice > values in WT mice; Blue color: values in mutant mice < values in WT mice
Order	Category	Parameter	F(3,52)	p	p value (Tukey’s test)	FDR corrected p values (hzhz/wtwt)
1	Kinematics	Short arrest number (dark)	10.8719	> 0.0001	<0.0001 (hzhz/wtwt); 0.0035 (hzwt/wtwt)	0.000225
2		Short arrest duration (dark)	6.9481	0.0005	0.0011 (hzhz/wtwt); 0.0297 (wthz/wtwt); 0.0111 (hzwt/wtwt)	0.00981818
3		Mean short arrest duration (dark)	6.3144	0.001	0.0008 (hzhz/wtwt); 0.0295 (hzhz/wthz)	0.008
4		Long arrest number (dark)	7.4911	0.0003	0.0006 (hzhz/wtwt); 0.0103 (wthz/wtwt); 0.0173 (hzwt/wtwt)	0.00675
5		Long arrest duration (dark)	0.9395	0.4283
6		Mean long arrest duration (dark)	6.963	0.0005	0.0012 (hzhz/wtwt); 0.004 (hzwt/wtwt)	0.00981818
7		Short movement number (dark)	14.9821	> 0.0001	<0.0001 (hzhz/wtwt); 0.0269 (wthz/wtwt); 0.0005(hzwt/wtwt)	0.000225
8		Short movement distance (dark)	13.8479	> 0.0001	< 0.0001 (hzhz/wtwt); 0.0047 (wthz/wtwt); 0.0012 (hzwt/wtwt)	0.000225
9		Mean short movement distance (dark)	0.7941	0.5027
10		Long movement number (dark)	3.7986	0.0154	0.015 (hzhz/wtwt)	0.0613636
11		Long movement distance (dark)	2.5244	0.0677
12		Mean long movement distance (dark)	0.369	0.7756
13		Long arrest threshold	1.8626	0.1474
14		Long movement max. velocity	1.616	0.1969
15		Long movement fraction of total movement	5.0022	0.004	0.0026 (hzhz/wtwt)	0.014625
16		Short arrest number (light)	7.1414	0.0004	0.0021 (hzhz/wtwt); 0.0343 (hzwt/wtwt); 0.0122 (hzhz/wthz)	0.0145385
17		Short arrest duration (light)	5.8907	0.0015	0.0064 (hzhz/wtwt); 0.026 (hzhz/wthz)	0.0288
18		Mean short arrest duration (light)	0.8346	0.481
19		Long arrest number (light)	5.4209	0.0025	0.0047 (hzhz/wtwt)	0.0235
20		Long arrest duration (light)	1.9279	0.1365
21		Mean long arrest duration (light)	5.0674	0.0038	0.0018 (hzwt/wtwt)
22		Short movement number (light)	6.6145	0.0007	0.0025 (hzhz/wtwt); 0.0408(hzwt/wtwt); 0.0222 (hzhz/wthz)	0.014625
23		Short movement distance (light)	6.3707	0.0009	0.0023 (hzhz/wtwt); 0.0385 (hzwt/wtwt); 0.0413 (hzhz/wthz)	0.014625
24		Mean short movement distance (light)	0.5766	0.633
25		Long movement number (light)	6.1699	0.0011	0.0055 (hzhz/wtwt); 0.0204 (hzwt/wtwt)	0.0260526
26		Long movement distance (light)	5.9636	0.0014	0.0033 (hzhz/wtwt); 0.0471 (hzwt/wtwt)	0.0174706
27		Mean long movement distance (light)	2.5426	0.0662
28		Long movement threshold	1.4626	0.2355
29	Activity	Activity number (dark)	4.068	0.0114	0.0103 (wthz/wtwt)
30		Activity duration (dark)	3.6158	0.019	0.0487 (hzhz/wtwt)	0.17532
31		Mean activity duration (dark)	1.151	0.3373
32		Feeding zone duration (dark)	0.8383	0.4791
33		Spout zone duration (dark)	0.994	0.403
34		OnShelter zone duration (dark)	9.4704	> 0.0001	0.0001 (hzhz/wtwt); 0.0017 (hzhz/wthz)	0.0018
35		OnShelter zone number (dark)	11.2957	> 0.0001	0.0001 (hzhz/wtwt); 0.0017 (hzwt/wtwt); 0.0108 (hzwt/wthz); 0.0032 (hzhz/wthz)	0.000225
36		Activity number (light)	3.3162	0.0269	0.0393 (hzhz/wtwt)	0.153783
37		Activity duration (light)	3.8477	0.0146	0.0485 (hzhz/wtwt)	0.17532
38		Mean activity duration (light)	1.9479	0.1333
39		Feeding zone duration (light)	1.6039	0.1997
40		Spout zone duration (light)	1.4815	0.2303
41		OnShelter zone number (light)	12.1097	> 0.0001	0.0014 (hzhz/wtwt); 0.0004 (hzwt/wtwt); 0.0002 (hzwt/wthz); 0.0008 (hzhz/hzwt)	0.0105
42		OnShelter zone duration (light)	14.4731	> 0.0001	0.0002 (hzhz/wtwt); 0.0001 (hzwt/wtwt); 0.0001 (hzwt/wthz); 0.0002 (hzhz/wthz)	0.003
43	Sheltering	Short shelter visit number (dark)	1.2163	0.313
44		Short shelter visit duration (dark)	0.0684	0.9765
45		Mean short shelter visit duration (dark)	1.6643	0.186
46		Long shelter visit number (dark)	2.5283	0.0674
47		Long shelter visit duration (dark)	3.4506	0.023	0.0364 (wthz/wtwt); 0.0356 (hzwt/wthz)
48		Mean long shelter visit duration	4.4949	0.007	0.0195 (hzwt/wthz); 0.033 (hzhz/wthz)
49		Short shelter visit threshold	1.457	0.237
50		Long shelter visit fraction of total visits	7.9212	0.0002	0.0197 (wthz/wtwt); 0.0002 (hzwt/wthz); 0.0012 (hzhz/wthz)
51		Long shelter visit threshold	1.2366	0.3059
52		Short shelter visit number (light)	0.3985	0.7547
53		Short shelter visit duration (light)	0.1004	0.9594
54		Mean short shelter visit duration (light)	1.6572	0.1908
55		Long shelter visit number (light)	5.6832	0.0019	0.0096 (hzhz/wtwt); 0.0098 (hzwt/wtwt)	0.0411429
56		Long shelter visit duration (light)	0.3376	0.7982
57	Habituation ratio (HR)	Long arrest number (HR dark)	4.0275	0.0119	0.0111(hzwt/wtwt)
58		Long arrest duration (HR dark)	0.6171	0.6071
59		Mean long arrest duration (HR dark)	5.1413	0.0034	0.0023 (hzwt/wtwt)
60		Mean short arrest duration (HR dark)	3.5612	0.0203	0.0298 (hzhz/wthz)
61		Mean long movement distance (HR dark)	1.788	0.1609
62		Mean short movement distance (HR dark)	0.4075	0.7483
63		Activity number (HR dark)	2.5131	0.0686
64		Activity duration (HR dark)	3.5604	0.0203
65		Mean activity duration (HR dark)	3.697	0.0174	0.009 (hzhz/wthz)
66		Feeding zone duration (HR dark)	0.3783	0.769
67		Spout zone duration (HR dark)	0.0782	0.9715
68		OnShelter zone duration (HR dark)	10.0874	> 0.0001	0.0004 (hzhz/wtwt); 0.0204 (hzwt/wtwt); 0.0102 (hzwt/wthz); 0.0007 (hzhz/wthz)	0.00514286
69		Long shelter visit duration (HR dark)	1.2169	0.3128
70		Mean short shelter visit duration (HR dark)	1.1794	0.3266
71	Dark-light index (DLI)	Long arrest number (DLI)	3.4611	0.0227	0.037 (hzwt/wthz)
72		Long arrest duration (DLI)	2.5017	0.0695
73		Mean long arrest duration (DLI)	2.6722	0.0569
74		Mean short arrest duration (DLI)	0.3356	0.7996
75		Mean long movement distance (DLI)	0.8652	0.4651
76		Mean short movement distance (DLI)	0.6392	0.5932
77		Activity number (DLI)	2.3636	0.0817
78		Activity duration (DLI)	3.2762	0.0282	0.0321 (hzwt/wthz)
79		Mean activity duration (DLI)	0.6218	0.6041
80		Feeding zone duration (DLI)	1.397	0.2541
81		Spout zone duration (DLI)	1.3808	0.2589
82		OnShelter zone duration (DLI)	3.5983	0.0197
83		Long shelter visit duration (DLI)	2.4095	0.0774
84		Long shelter visit number (DLI)	1.3054	0.2825
85		Mean short shelter visit duration (DLI)	0.3645	0.7789
86	Phase transition	Activity change in anticipation of light	0.3234	0.8084
87		Activity change in response to light	1.1608	0.3336
88		Feeding zone change in anticipation light	1.5784	0.2057
89		OnShelter zone change in anticipation light	2.7296	0.0532
90		Spout zone change in anticipation light	0.7937	0.503

## Sheet: Suppl. Table 3
Suppl.Table 3: MiniMUGA analysis of genetic background and flanking genes region.
		ephys experiment	background strain		QC			secondary strain
					Number of consistent SNP with primary background (total = 9721)	primary substrain		Number of consistent SNPs	strain
M18-1 Snap25	WTWT	2	C57BL/6	no genetic construct	9560(99.9%)	0.968	C57BL/6J
M18-1 Snap25	WTWT	2	C57BL/6	no genetic construct	9501 (99.8%)	0.962	C57BL/6J
M18-1 Snap25	WTWT	2	C57BL/6	no genetic construct	9500 (99.9%)	0.962	C57BL/6J
M18-1 Snap25	HZWT	2	C57BL/6	poly A signal sequence	9572 (99.9%)	0.968	C57BL/6J	9 clustered	129 strains
M18-1 Snap25	HZWT	2	C57BL/6	poly A signal sequence	9540 (99.8%)	0.962	C57BL/6J	inconsistent
M18-1 Snap25	HZWT	2	mini MUGA cannot explain this sample: primary+ secondary < 99.8%	poly A signal sequence	< 99.8%*	97.4	C57BL/6J
M18-1 Snap25	WTHZ	2	mini MUGA cannot explain this sample: primary+ secondary < 99.8%	no genetic construct	< 99.8%*	0.968	C57BL/6J
M18-1 Snap25	WTHZ	2	C57BL/6	no genetic construct	9510 (99.5%)	0.968	C57BL/6J	39 clustered	129 strains
M18-1 Snap25	WTHZ	2	C57BL/6	no genetic construct	9532(99.6%)	0.968	C57BL/6J	39 clustered	129 strains
M18-1 Snap25	HZWT	1	multiple C57BL/6 substrains	poly A signal sequence	9294 (99.9%)	0.93	C57BL/6JBomTac	5 clustered	129 strains
M18-1 Snap25	HZWT	1	multiple C57BL/6 substrains	poly A signal sequence	9291(99.9%)	0.884	C57BL/6JBomTac	5 clustered	129 strains
M18-1 Snap25	HZWT	1	multiple C57BL/6 substrains	poly A signal sequence	< 99.8%*	0.86	C57BL/6JBomTac
M18-1 Snap25	WTHZ	1	C57BL/6JBomTac	no genetic construct	< 99.8%*	0.93	C57BL/6JBomTac	unexplained
M18-1 Snap25	WTHZ	1	C57BL/6JBomTac	no genetic construct	9519 (99.8%)	0.953	C57BL/6JBomTac	unexplained
M18-1 Snap25	WTHZ	1	multiple C57BL/6 substrains	no genetic construct	< 99.8%*	0.907	C57BL/6JBomTac
					* did not pass QC for inbred lines
