# Supplementary material for: Phenotypic diversity is caused by non-linear genetic interactions between two SNAREopathy genes
Source: Research Square preprint supplement (doi:10.21203/rs.3.rs-6440830/v1), 2025-05-07
Supplement: Supplementary file 1 [file 161760ee469b18db7a593d52.pdf]

Figure S1

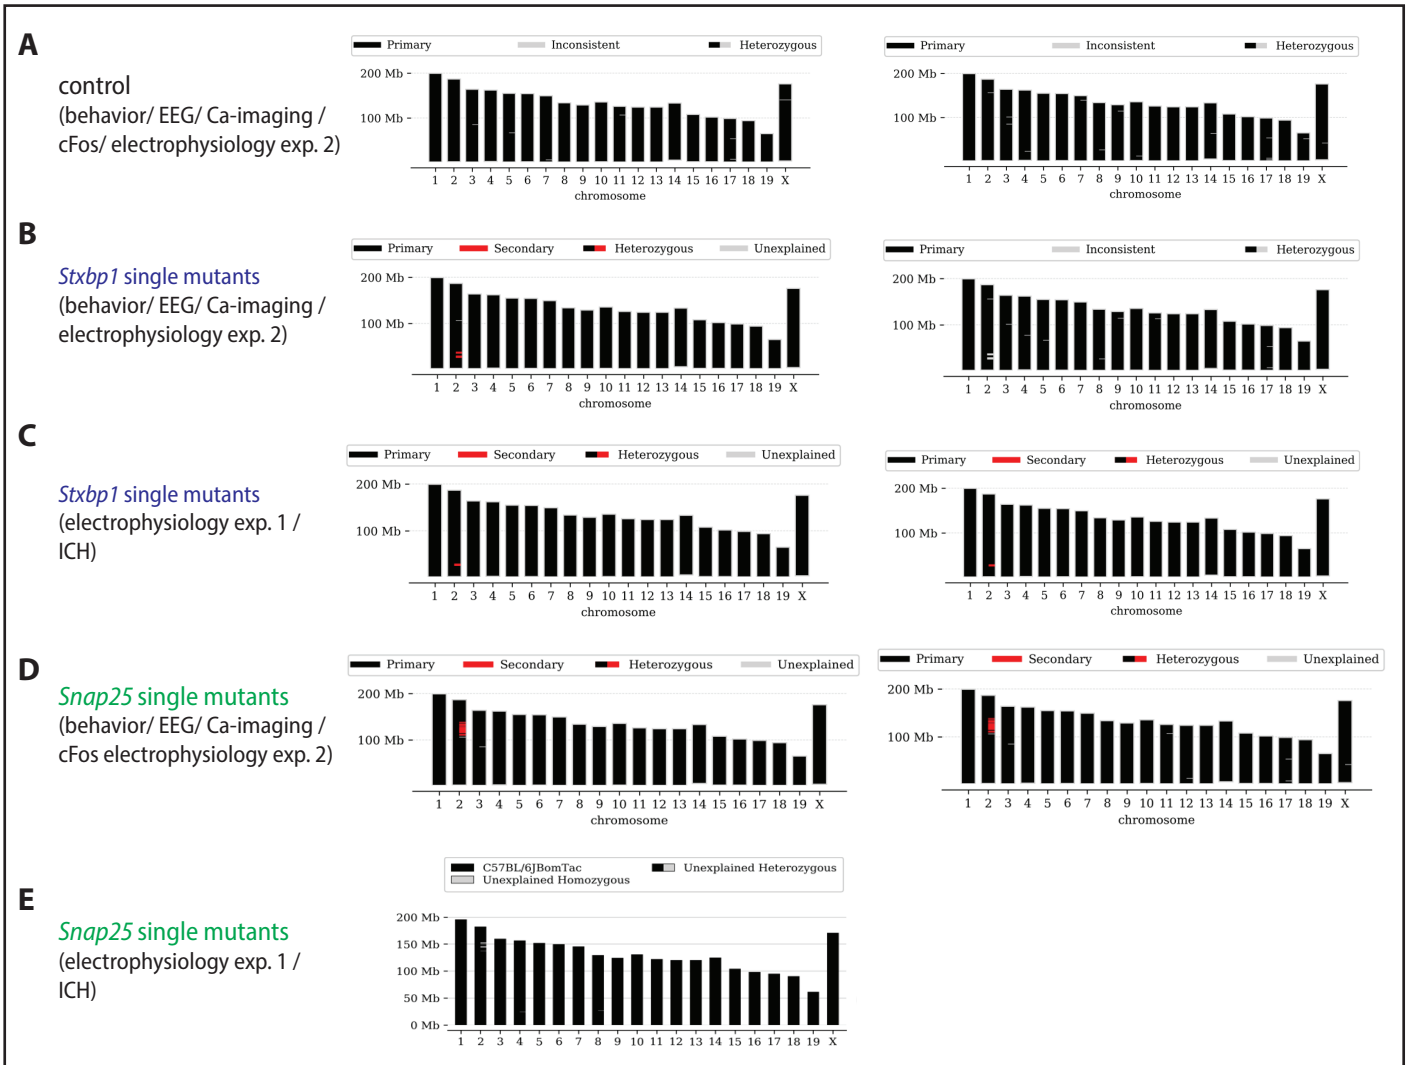

**Figure S2**

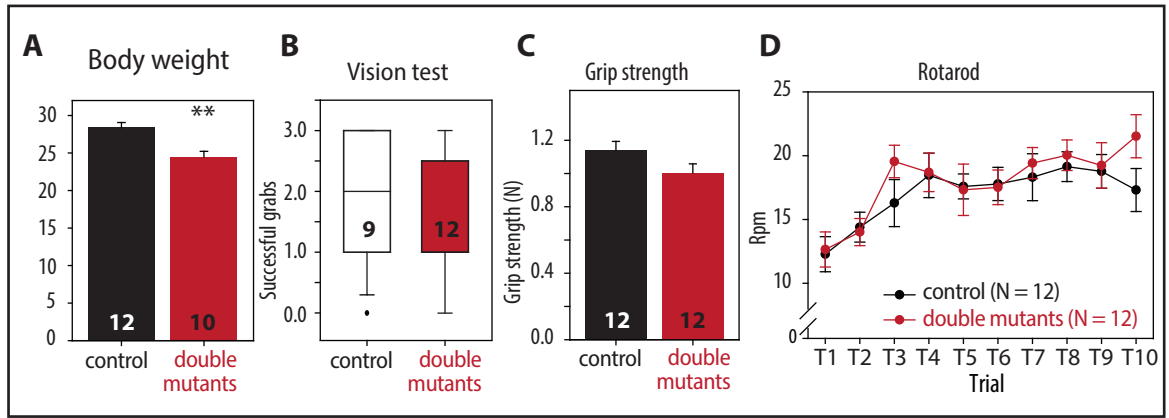

Figure S3

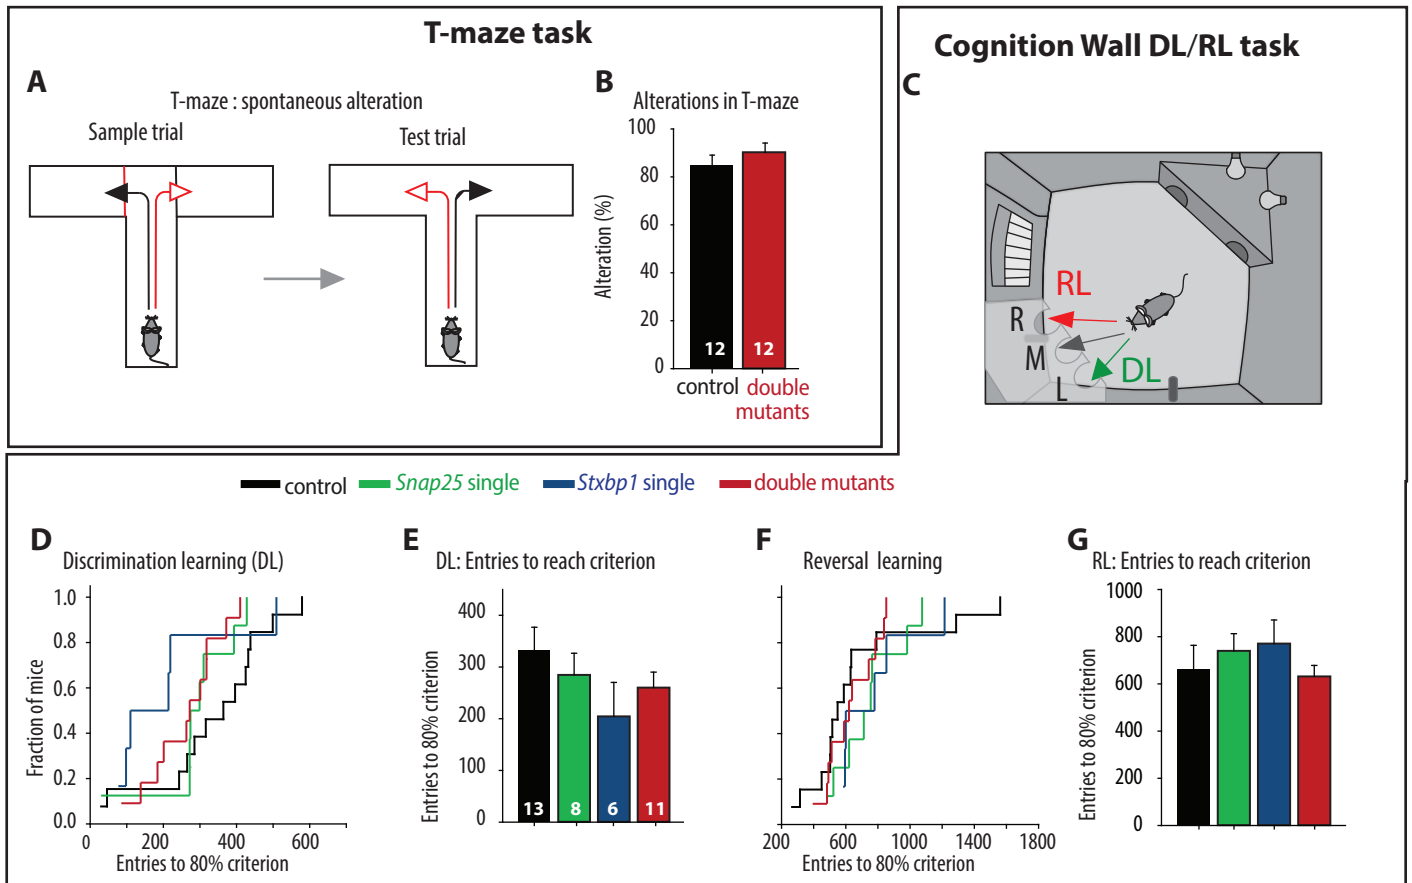

Figure S4

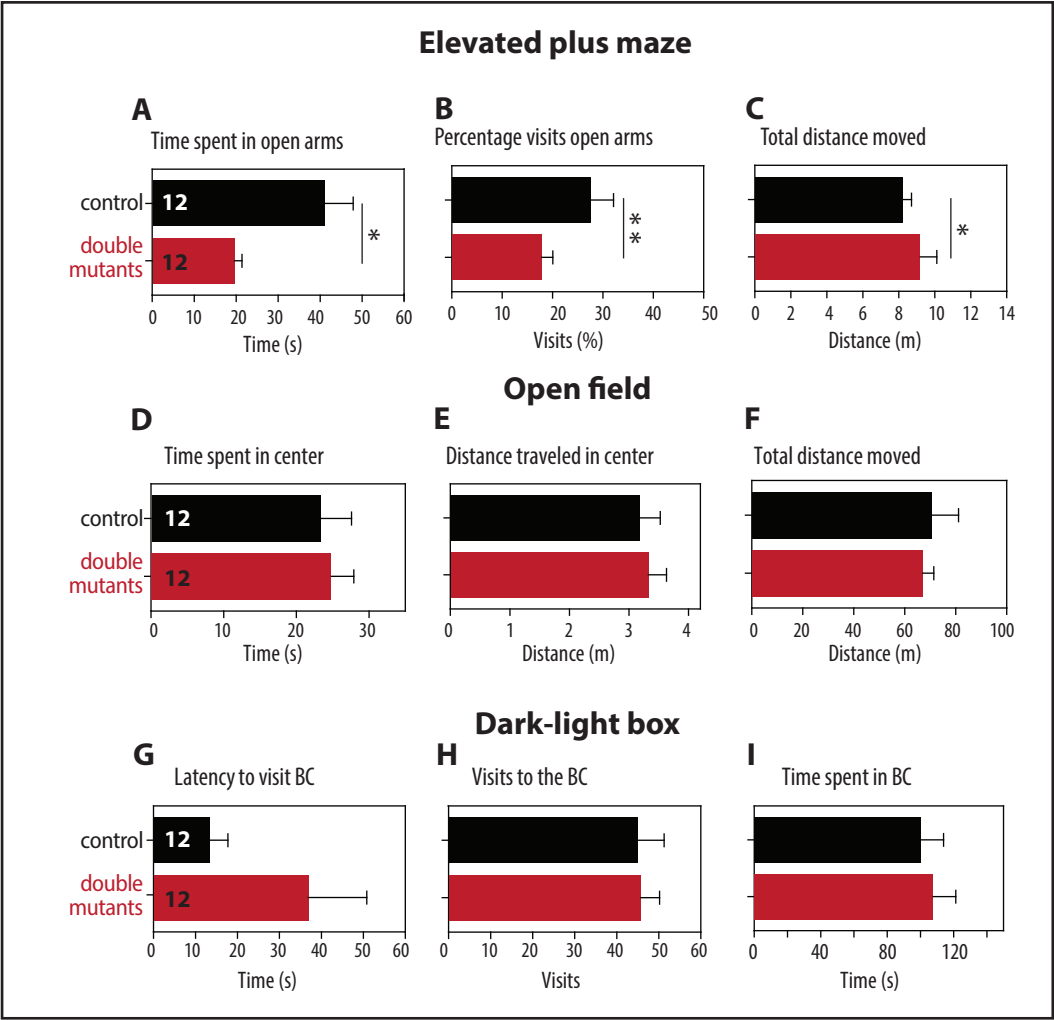

**Figure S5**

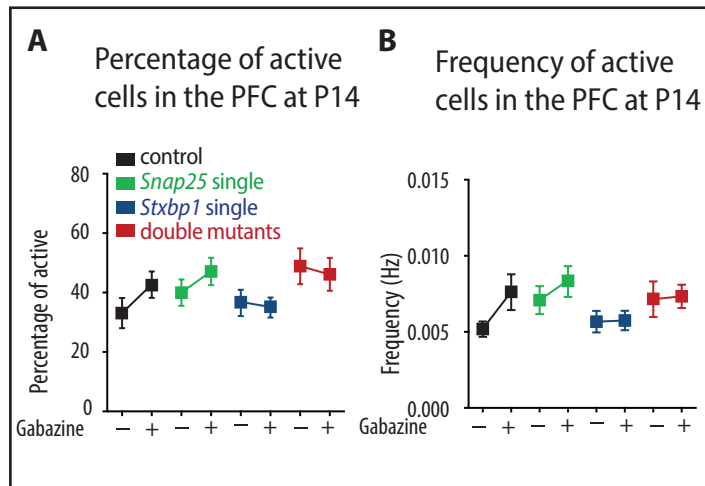

Figure S6

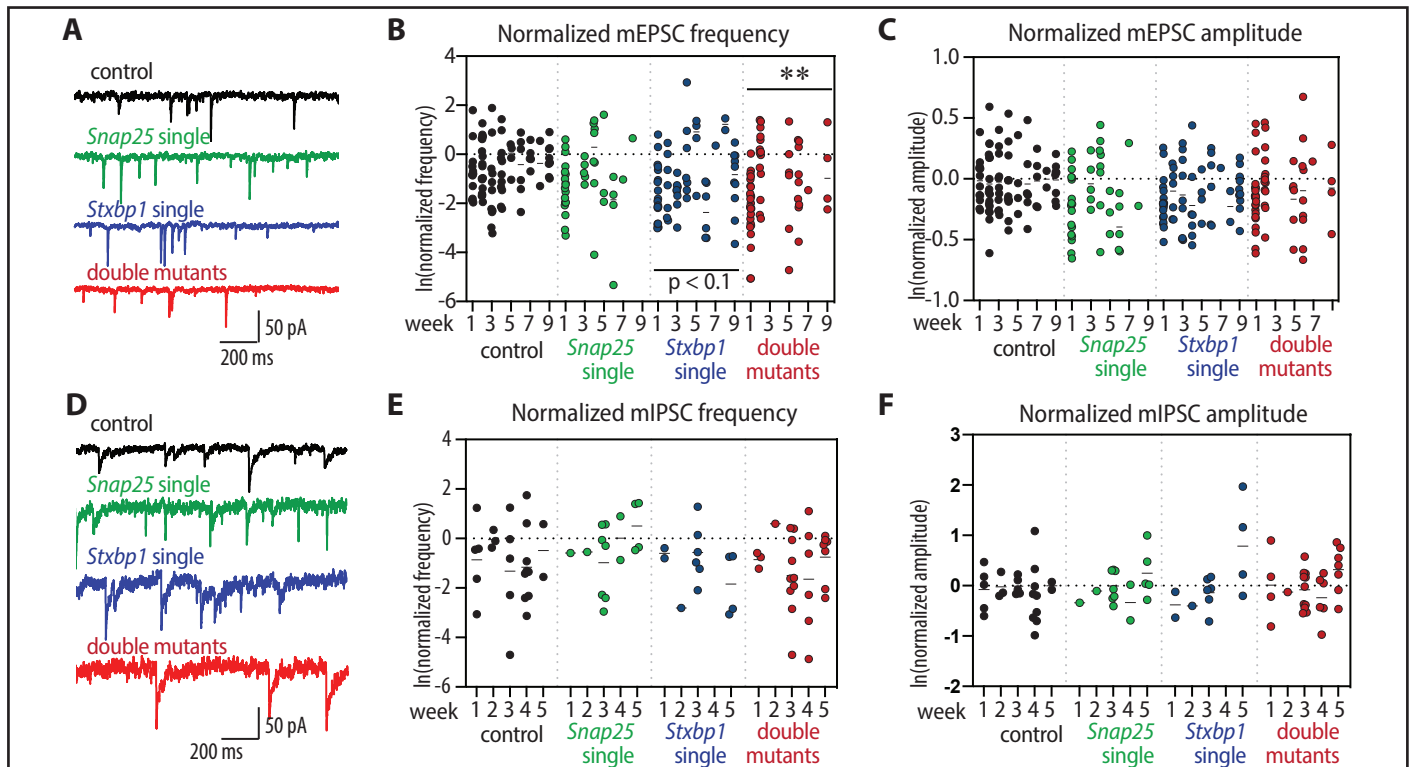

**Figure S7**

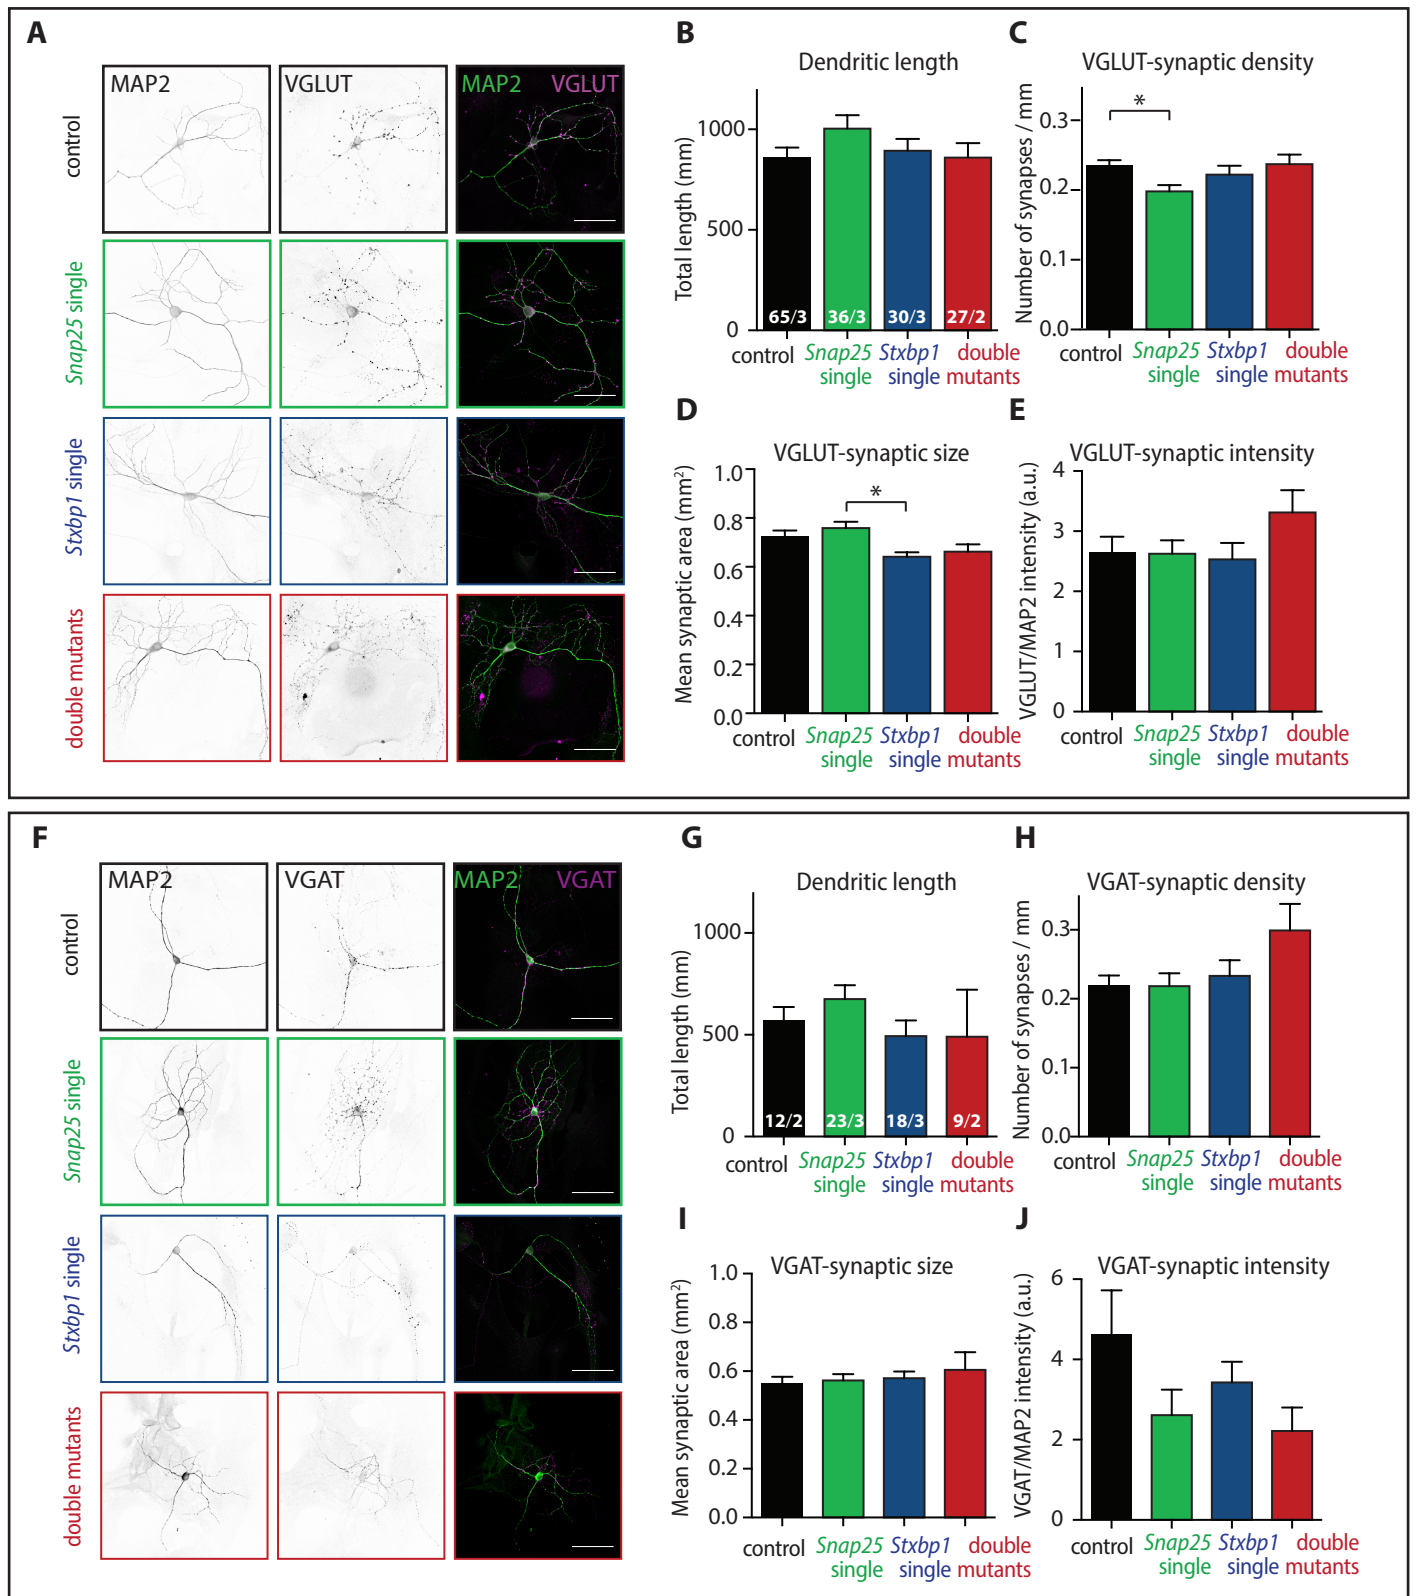

## SUPPLEMENTARY FIGURE LEGENDS:

**Supplementary Figure 1 MiniMUGA genetic background analysis.** (A) Control (*Stxbp1*<sup>+/+</sup>*Snap25*<sup>+/+</sup>) samples from laboratory 1 were of excellent quality and analysis revealed the presence of 96.4% C57BL/6J substrain diagnostic SNP probes as a primary background. (B) *Stxbp1* single samples from laboratory 1 were inbred (96.5% consistency with C57BL/6J diagnostic markers) with the presence of multiple 129-strains markers in one sample and unexplained secondary background in the second sample. (C) *Stxbp1* single samples from laboratory 2 contained multiple C57BL/6 sub-strains background markers, with dominant C57BL/6JBomTac sub-strain and several clusters with 129-strains markers. (D) Two *Snap25* single samples from laboratory 1 were C57BL/6J inbred with the presence of multiple 129-strains markers. (E) *Snap25* single samples from laboratory 1 was C57BL/6JBomTac inbred with the presence of unexplained secondary background.

**Supplementary Figure 2: Body weight and general behavior in double mutants.** (A) Body weight was measured in 8 weeks old animals. (B) Vision test scored number of successful grabs to reach for the platform. (C) Grip strength test scored the amount of force that mice applied grasping a pull bar. (D) Rotarod test measured the maximum rpm reached per trial.

**Supplementary Figure 3: Assessment of different aspects of cognition.** (A) Representation of T-maze spontaneous alteration protocol consists of two trials: sample and test trial during which animal's working memory was assessed. (B) Percentage of alteration in the T maze for control and double mutants. (C) Representation of CognitionWall task protocol for assessment of discrimination (DL) and reversal (RL) learning. (D) Kaplan-Meier survival curves shows the fraction of control (black), *Snap25* single (green), *Stxbp1* single (blue) and double mutants

(red) that reached the 80% criterion as a function of hole entries during the DL phase. (E) Average number of entries made to reach the 80% criterion during DL phase. (F) Kaplan-Meier survival curves shows the fraction of control (black), *Snap25* single (green), *Stxbp1* single (blue) and double mutants (red) that reached the 80% criterion as a function of hole entries during the RL phase. (G) Average number of entries made to reach the 80% criterion during RL phase.

**Supplementary Figure 4: Assessment of anxiety-related behavior in double mutants.** (A) Time spent in open arms of elevated plus maze (EPM). (B) Percentage of visits to the open arms of EPM. (C) Total distance moved in the EPM. (D) Time spent in the central part of the OF. (E) Distance traveled in center of the OF. (F) Total distance moved. (G) Latency to visit bright compartment (BC) of the dark-light box. (H) Number of visits to the BC. (I) Time spent in BC.

**Supplementary Figure 5: Calcium imaging of PFC- brain slice.** (A-B) Percentage of active cells (A) and frequency of their activity (B) at baseline and after application of gabazine in PFC-brain slices from control, *Snap25* single-, *Stxbp1* single-, and double mutants.

**Supplementary Figure 6: Assessment of spontaneous release in excitatory and inhibitory hippocampal autaptic neurons.** (A) Typical spontaneous release traces in control, *Snap25* single-, *Stxbp1* single- and double- mutants glutamatergic neurons (B) Normalized frequency of spontaneous release (mEPSC) of glutamatergic neurons per week. mEPSC frequency was significantly lower in double mutants glutamatergic neurons compared to control group. (C) Normalized amplitude of mEPSC per week. (D) Typical spontaneous release traces in control-, *Stxbp1* single-, *Snap25* single- and double mutants GABA-ergic neurons (E) Normalized

frequency of spontaneous release (mIPSC) of GABA-ergic neurons per week. **(F)** Normalized amplitude mIPSC per week. \*\*  $p < 0.01$ .

**Supplementary Figure 7: Morphological analysis of ICH-stained dissociated hippocampal neurons.** **A)** Dissociated hippocampal neurons were stained for morphological marker (MAP2) and glutamatergic marker (VGLUT). Examples represent control, *Snap25* single-, *Stxbp1* single- and double- mutants neurons. **B-E)** Quantification of several morphological parameters in glutamatergic neurons: B) Total dendritic length. C) Synaptic density. D) Synaptic size and E) Synaptic intensity. **F)** Dissociated hippocampal neurons were stained for morphological marker (MAP2) and GABAergic marker (VGAT). Examples represent control, *Snap25* single-, *Stxbp1* single- and double- mutants neurons. **B-E)** Quantification of several morphological parameters in GABAergic neurons: B) Total dendritic length. C) Synaptic density. D) Synaptic size and E) Synaptic intensity.
